# Supplementary material for: Diversification of ergot alkaloids and heritable fungal symbionts in morning glories
Source: PubMed Central journal article supplement (PMC8648897; doi:10.1038/s42003-021-02870-z), 2021-12-06
Supplement: 42003_2021_2870_MOESM2_ESM.pdf [file 42003_2021_2870_MOESM2_ESM.pdf]

## Description of Additional Supplementary Files

**File name:** Supplementary Data 1

**Description:** Sampling information and results. Naming authority and geographic information were collected from the World Checklist of Selected Families at <https://wcsp.science.kew.org>.

**File name:** Supplementary Data 2

**Description:** Accession information of all sequences included in the ITS phylogeny.

**File name:** Supplementary Data 3

**Description:** ITS phylogeny of morning glories with EAs. ITS phylogeny adapted from Munoz et al.<sup>27</sup> colorized with our EA data. Orange species are EA- and blue species are EA+.

**File name:** Supplementary Data 4

**Description:** All herbarium specimens used in the study. Source data for Figure 1.

**File name:** Supplementary Data 5

**Description:** *Ipomoea*, *Argyrei*, *Stictocardia*, and *Turbina* occurrence data from GBIF. Source data for Figure 1.

**File name:** Supplementary Data 6

**Description:** RaxML phylogeny. Source data for Figure 2, 3, and 4.

**File name:** Supplementary Data 7

**Description:** Metadata for species in the phylogeny. Source data for Figure 2.

**File name:** Supplementary Data 8

**Description:** Ergot alkaloid data for species in the phylogeny. Source data for Figure 4.

**File name:** Supplementary Data 9

**Description:** Source data for Figure 5.
